# Supplementary material
Source: PubMed Central journal article supplement (PMC8487325)
Supplement: mmc1.pdf [file mmc1.pdf]

## 755 A Supplementary materials

### 756 A.1 Overview of model assumptions and limitations

757 The following assumptions were made concerning the SEIQRD dynamics:

- 758 1. All individuals experience a brief presymptomatic, infectious period.
- 759 2. All individuals, including children, are equally susceptible to SARS-CoV-2 infection.  
760 It is unlikely that lower susceptibility in children would alter the dominant role of  
761 schools in SARS-CoV-2 transmission. During model calibration, a higher effectivity  
762 of the contacts in schools ( $\Omega_{\text{schools}}$ ) could compensate for the lower susceptibility in  
763 children.
- 764 3. Asymptomatic and mild cases automatically lead to recovery and in no case to death.
- 765 4. Mildly infected and hospitalized individuals cannot infect susceptibles (= *quarantined*).  
766 A fraction of individuals experiencing influenza-like illness will not reduce their num-  
767 ber of non-household contacts and will thus contribute to disease spread [52]. In our  
768 model, this behavior is not accounted for. The model cannot be used to model the  
769 effect of transmission to healthcare workers.
- 770 5. All deaths come from hospitals, meaning no patients died at home [53].
- 771 6. The modeled population is the general population of Belgium and does not explicitly  
772 take nursing homes into account. The model is unfit to make predictions on nursing  
773 home deaths.
- 774 7. Waning of antibody immunity is incorporated in the model as individuals transition-  
775 ing from the recovered (R) population pool to the susceptible (S) population pool. The  
776 incorporation of antibody waning ignores the effects of cellular immunity (through T-  
777 and B-cells). More research on the exact kinetics of the immune response is necessary  
778 to finetune to the model.

779 The following assumptions to the hospital dynamics were made:

- 780 1. Upon arrival in the hospital, all patients immediately transfer to a cohort ward or an  
781 ICU. In real life, a patient may first spend some time in a cohort ward before going to  
782 an ICU and this is not accounted for.
- 783 2. Residence times in cohort and in ICU differ depending on the outcome of the infection  
784 (recovered or deceased).
- 785 3. All recovered ICU patients spend some additional time in cohort (recovery and obser-  
786 vation stay).

- 787 4. Patients in nursing homes were excluded from the analysis of the clinical surveillance  
788 dataset. The model can make predictions on hospital deaths in individuals coming  
789 from the general population.
- 790 5. During the analysis of the hospital surveillance data, the data analysis was not split  
791 into several time intervals and hence the temporal changes in hospital residence times  
792 and mortalities were neglected. In spite, Faes et al. [41] have reported that the median  
793 residence time decreased after the first 2020 COVID-19 wave.

794 The following assumptions were made in the social contact model:

- 795 1. Prepandemic contact matrices by Willem et al. [14] are scaled with mobility reductions  
796 extracted from the GCMRs and an effectivity parameter inferred from hospitalization  
797 data using a *Markov-Chain Monte-Carlo* method to mimic pandemic social behavior.
- 798 2. The GCMRs are not age-stratified and do not correct for a potential underrepresenta-  
799 tion of older individuals in the data collection. The GCMRs are a more coarse-grained  
800 approach as compared to social-epidemiological contact studies that estimate mixing  
801 patterns under lockdown measures [17]. However, setting up a survey-based contact  
802 study is a resource and time-intensive endeavor. The advantage of using the GCMRs in  
803 our social contact model is their rapid and public availability, making their use appro-  
804 priate during the early stages of a pandemic when more accurate survey-based contact  
805 studies are being set up.
- 806 3. The effectivity of the contacts ( $\Omega_x$ ) are bound between zero and one. This implies that  
807 if work mobility is reduced to 40 % of its pre-pandemic value, the work contacts can  
808 account for no more than 40 % of its pre-pandemic value.
- 809 4. There is no link between the effectivity parameters and the mobility reduction. How-  
810 ever, when relaxing measures, an increase in mobility will likely be accompanied by an  
811 increase in the effectiveness of school contacts. This is due to mentality changes upon  
812 relaxation, as measures will gradually be ignored more.

## 813 A.2 Overview of model parameters

Table 1: Overview of simulation parameters used in the extended SEIQRD metapopulation model.

| Symbol               | Parameter                                                                                                                                                                       | Value                                                                                | Unit               | Reference                      |
|----------------------|---------------------------------------------------------------------------------------------------------------------------------------------------------------------------------|--------------------------------------------------------------------------------------|--------------------|--------------------------------|
| $a$                  | subclinical fraction per age group                                                                                                                                              | [0.98 0.98 0.88 0.69 0.59 0.39 0.13 0.07 0.01]<br>population mean: 0.57              | (-)                | Wu et al. [37]                 |
| $h$                  | fraction of mildly infected individuals requiring hospitalisation                                                                                                               | [0.01 0.02 0.02 0.02 0.02 0.05 0.11 0.22 0.57]<br>population mean: 0.08              | (-)                | Inferred                       |
| $c$                  | fraction of hospitalisations not requiring ICU transfer                                                                                                                         | Table 4, population mean: 0.84                                                       | (-)                | Hospital dataset               |
| $d_a$                | duration of subclinical infection                                                                                                                                               | 6.54                                                                                 | days               | Inferred                       |
| $d_m$                | duration of mild infection                                                                                                                                                      | 7                                                                                    | days               | To et al. [32]                 |
| $d_{\text{hosp}}$    | average time from symptom onset to hospitalization                                                                                                                              | Table 6, population mean: 6.4                                                        | days               | Hospital dataset               |
| $d_{C,R}$            | length of cohort stay if recovered                                                                                                                                              | Table 5, population mean: 10.8                                                       | days               | Hospital dataset               |
| $d_{C,D}$            | length of cohort stay if deceased                                                                                                                                               | Table 5, population mean: 11.8                                                       | days               | Hospital dataset               |
| $d_{ICU,R}$          | length of ICU stay if recovered                                                                                                                                                 | Table 5, population mean: 12.0                                                       | days               | Hospital dataset               |
| $d_{ICU,D}$          | length of ICU stay if deceased                                                                                                                                                  | Table 5, population mean: 15.2                                                       | days               | Hospital dataset               |
| $d_{ICU,\text{rec}}$ | length of recovery and observation stay in cohort after ICU stay                                                                                                                | Table 6, population mean: 11.2                                                       | days               | Hospital dataset               |
| $m_C$                | mortality in cohort                                                                                                                                                             | Table 4, population mean: 0.17                                                       | (-)                | Hospital dataset               |
| $m_{ICU}$            | mortality in ICU                                                                                                                                                                | Table 4, population mean: 0.46                                                       | (-)                | Hospital dataset               |
| $\sigma$             | length of latent period                                                                                                                                                         | 4.5                                                                                  | days               | Computed                       |
| $\omega$             | length of presymptomatic infectious period                                                                                                                                      | 0.7                                                                                  | days               | Wei et al. [7], He et al. [29] |
| $\sigma + \omega$    | length of incubation period                                                                                                                                                     | 5.2                                                                                  | days               | Liu et al. [6]                 |
| $\beta$              | probability of infection upon contact with an individual capable of transmitting SARS-CoV-2 under the assumption that the infectee is 100 % susceptible to SARS-CoV-2 infection | 0.032                                                                                | (-)                | Inferred                       |
| $T_0$                | total population                                                                                                                                                                | [1.31 1.30 1.40 1.50 1.52 1.60 1.35 0.91 0.66]*1e6,<br>total population: 11.54 * 1e6 | people             | StatBEL [54]                   |
| $N_c$                | contact matrix                                                                                                                                                                  | 9x9 matrix                                                                           | days <sup>-1</sup> | Willem et al. [14]             |

814 **A.3 Key events**

815 The first lockdown, which started on March 15th, 2020, and lasted until May 4th, 2020 in-  
816 volved the closure of schools, bars, clubs, restaurants, all non-essential shops, and closure  
817 of the border to non-essential travel (Table 2). The GCMRs show a 56 % reduction in work-  
818 place mobility (Figure 2 and Table 2). Based on surveys from the Belgian National Bank,  
819 28.6 % of all employees were able to work from home, 29.9 % remained in the workplace  
820 and 4.4 % worked both from home and in the workplace. 32.4 % were temporary unem-  
821 ployed and 4.8 % were absent [55]. Public transport mobility decreased by 65 %, leisure  
822 mobility decreased by 72 %, and grocery & pharmacy mobility was reduced by 26 %. From  
823 March 15th, 2020 until May 4th, 2020, mobility remained practically constant at the afore-  
824 mentioned reductions. On May 4th, 2020 the lockdown was gradually lifted by re-opening  
825 all non-essential shops and lifting telework restrictions. The effect can be seen in the *Google*  
826 *Community Mobility Reports* (Figure 2), by the end of April, workplace and retail & recreation  
827 mobility gradually start increasing. By July 1st, 2020, almost all social measures had been  
828 lifted. During the first lockdown, schools remained fully closed until May 18th, 2020, and  
829 were only re-opened to a very limited extent before the end of the school year on July 1st,  
830 2020. For this reason, schools are assumed to remain closed during the first COVID-19 wave.  
831 During July, there were few social restrictions, and this resulted in new, localized infection  
832 clusters. During most of August 2020, a lockdown with a curfew was imposed in Belgium's  
833 Antwerp province. We do not attempt to model the hospitalizations during July and August  
834 2020, as modeling localized infection clusters with a nation-level epidemiological model can  
835 only be accomplished by severe ad-hoc tweaks in the social contact model. A spatial model  
836 extension was developed to better account for such localized phenomena.

837

838 During the second lockdown from October 19th, 2020 until the present day (26/02/2021),  
839 workplace mobility has been reduced by approximately 25 %. During Autumn break and  
840 Christmas holidays, workplace mobility further declined to approximately 45 %. Public  
841 transport mobility decreased by 30 % and by 50 % during holidays, leisure mobility de-  
842 creased by 40-50 % and grocery & pharmacy mobility have decreased by approximately 5-10  
843 %. Primary and secondary schools were closed between October 19th, 2020, and re-opened  
844 on November 16th, 2020. Further, schools have been closed during the Christmas holidays  
845 from December 18th, 2020 until January 4th, 2021, and were closed during spring break from  
846 February 15th, 2021 until February 21th, 2021. Universities have remained fully closed since  
847 October 19th, 2020.

848

849 During both lockdowns, increases in the categories *residential* and *parks* were observed (Fig-  
850 ure 2). These are indicative of decreased mobility, as these suggest increased activity around  
851 the home environment. The other four categories are more indicative of general mobility as

852 they are related to activity around workplaces, retail outlets and use of public transporta-  
853 tion [43]. Thus, although the mobility figures indicate people spent more time at home, this  
854 does not mean people have more contacts at home (especially under stay-at-home orders).  
855 Amplifying the fraction of household contacts under lockdown measures would increase in-  
856 tergenerational mixing of the population under lockdown, which is unrealistic and will lead  
857 to overestimations of the hospitalizations. The inability to accurately capture the disease  
858 spread in home *bubbles* under lockdown measures is an inherent downside of compartmen-  
859 tal epidemiological models. We have thus not scaled the home interaction matrix ( $\mathbf{N}_{c,home}$ )  
860 with the residential mobility from the GCMRs.

Table 2: Dates of key events during the first and second lockdown in Belgium. Google mobility reduction (see Figure 2), computed as the average reduction between one key event and the next.

| Date                                            | Key event                  | Details                                                                                                                                                                          | $G_{work}$ | $G_{transit}$ | $G_{r\&r}$ | $G_{g\&p}$ | $H_{schools}$ |
|-------------------------------------------------|----------------------------|----------------------------------------------------------------------------------------------------------------------------------------------------------------------------------|------------|---------------|------------|------------|---------------|
| First COVID-19 wave (March - July 2020)         |                            |                                                                                                                                                                                  |            |               |            |            |               |
| 15/03/2020                                      | Lockdown                   | Closure of schools, bars, clubs and restaurants; Closure of all non-essential shops; Non-essential travel forbidden. [56]                                                        | -56 %      | -65 %         | -72 %      | -26 %      | -100 %        |
| 04/05/2020                                      | Lockdown release phase Ia  | Re-opening of industry and B2B services. Re-opening of non-essential retail. Merging of two <i>social bubbles</i> allowed [57].                                                  | -44 %      | -54 %         | -57 %      | -18 %      | -100 %        |
| 11/05/2020                                      | Lockdown release phase Ib  | Re-opening of all businesses and shops. Working at home remains the norm where possible.                                                                                         | -38 %      | -45 %         | -46 %      | -12 %      | -100 %        |
| 18/05/2020                                      | Lockdown release phase IIa | Re-opening of businesses that involve the most human-human contact (f.i. hairdressers). Re-opening of schools for graduating classes in elementary and secondary education [58]. | -38 %      | -39 %         | -39 %      | -8 %       | -100 %        |
| 04/06/2020                                      | Lockdown release phase III | Re-opening of bars and restaurants. Gatherings up to 10 persons are allowed.                                                                                                     | -22 %      | -27 %         | -15 %      | -4 %       | -100 %        |
| 01/07/2020                                      | Lockdown release phase IV  | Closure of schools for summer holidays. Gatherings of up to 15 persons are allowed.                                                                                              | -32 %      | -27 %         | -11 %      | -8 %       | -100 %        |
| 01/08/2020                                      | Antwerp Lock-down          | The number of infections starts increasing in Antwerp province, where a second lockdown with curfew is imposed [59].                                                             | -28 %      | -33 %         | -32 %      | -6 %       | -100 %        |
| Second COVID-19 wave (September 2020 - present) |                            |                                                                                                                                                                                  |            |               |            |            |               |
| 01/09/2020                                      | End of summer holidays     | Opening of elementary and secondary schools.                                                                                                                                     | -18 %      | -17 %         | -14 %      | -5 %       | -0 %          |
| 19/10/2020                                      | Lockdown                   | Closure of bars and restaurants; Curfew; Strict social restrictions. [60]                                                                                                        | -26 %      | -31 %         | -39 %      | -3 %       | -0 %          |
| 02/11/2020                                      | Lockdown                   | Closure of non-essential stores; Closure of all schools. [61]                                                                                                                    | -43 %      | -48 %         | -55 %      | -13 %      | -100 %        |
| 16/11/2020                                      | Schools reopen             | Elementary and secondary schools reopen. Universities remain closed.                                                                                                             | -27 %      | -37 %         | -44 %      | -5 %       | -0 %          |
| 12/18/2020 - 04/01/2021                         | Christmas holidays         | Elementary and secondary schools close. Decrease in work related mobility.                                                                                                       | -45 %      | -47 %         | -42 %      | -4 %       | -100 %        |
| 04/01/2021 - 15/02/2021                         | Period between holidays    | Elementary and secondary schools reopen. British variant (501Y.V1) starts spreading [62]. Vaccination campaign in elderly homes starts [63].                                     | -27 %      | -38 %         | -43 %      | -6 %       | -0 %          |

861 **A.4 Basic reproduction number**

862 Since the system of differential equations (Eq. 1 - Eq. 12), is autonomous, the eigenvalues of  
 863 the Jacobian matrix evaluated at its hyperbolic equilibrium point can be used to determine  
 864 the nature of that equilibrium [64]. The basic reproduction number ( $R_0$ ) is computed as  
 865 the spectral radius of the Jacobian matrix at the disease-free equilibrium [27]. Our model  
 866 has seven infected states:  $E$ ,  $I_{\text{presy}}$ ,  $I_{\text{asy}}$ ,  $Q_{\text{mild}}$ ,  $Q_{\text{cohort}}$ ,  $Q_{\text{ICU}}$  and  $Q_{\text{ICU,rec}}$  (Figure 1). At the  
 867 disease-free equilibrium, the whole population is susceptible to the infectious disease,  $S_i =$   
 868  $T_i$ ,

$$\mathbf{u}^* = (T_i, 0, 0, 0, 0, 0, 0, 0, 0). \quad (26)$$

869 The Jacobian  $\mathbf{J}$  is defined as,

$$\mathbf{J} = \begin{bmatrix} \left. \frac{\partial f_1}{\partial x_1} \right|_{\mathbf{u}^*} & \cdots & \left. \frac{\partial f_1}{\partial x_n} \right|_{\mathbf{u}^*} \\ \vdots & \ddots & \vdots \\ \left. \frac{\partial f_m}{\partial x_1} \right|_{\mathbf{u}^*} & \cdots & \left. \frac{\partial f_m}{\partial x_n} \right|_{\mathbf{u}^*} \end{bmatrix}, \quad (27)$$

870 where  $n$  and  $m$  are equal to the number of infected compartments. Next, the Jacobian is  
 871 decomposed in the following form,

$$\mathbf{J}^* = (\mathbf{T} + \mathbf{\Sigma})\mathbf{J}. \quad (28)$$

872 The matrix  $\mathbf{T}$  contains all terms that lead to *transmissions* of SARS-CoV-2, while  $\mathbf{\Sigma}$  contains  
 873 all terms that lead to *transitions*. For our model,

$$\mathbf{T} = \begin{bmatrix} 0 & \beta \sum_{j=1}^N N_{c,ij} & \beta \sum_{j=1}^N N_{c,ij} & 0 & 0 & 0 & 0 \\ 0 & 0 & 0 & 0 & 0 & 0 & 0 \\ \vdots & \vdots & \vdots & \vdots & \vdots & \vdots & \vdots \\ 0 & 0 & 0 & 0 & 0 & 0 & 0 \end{bmatrix}, \quad (29)$$

874 where an entry  $T_{i,j}$  is the rate at which individuals in infected state  $j$  gives rise to individuals  
 875 in infected state  $i$ . And,

$$\mathbf{\Sigma} = \begin{bmatrix} -1/\sigma & 0 & 0 & 0 & 0 & 0 & 0 \\ 1/\sigma & -1/\omega & 0 & 0 & 0 & 0 & 0 \\ 0 & a_i/\omega & -1/d_a & 0 & 0 & 0 & 0 \\ 0 & (1 - a_i)/\omega & 0 & -\left(\frac{1-h_i}{d_m} + \frac{h_i}{d_{\text{hosp}}}\right) & 0 & 0 & 0 \\ 0 & 0 & 0 & \frac{c_i h_i}{d_{\text{hosp}}} & -\left(\frac{m_{C,i}}{d_{c,D,i}} + \frac{1-m_{C,i}}{d_{c,R,i}}\right) & 0 & 0 \\ 0 & 0 & 0 & \frac{(1-c_i)h_i}{d_{\text{hosp}}} & 0 & -\left(\frac{m_{\text{ICU},i}}{d_{\text{ICU},D,i}} + \frac{1-m_{\text{ICU},i}}{d_{\text{ICU},R,i}}\right) & 0 \\ 0 & 0 & 0 & 0 & 0 & \frac{1-m_{\text{ICU},i}}{d_{\text{ICU},R,i}} & -\frac{1}{d_{\text{ICU,rec},i}} \end{bmatrix}, \quad (30)$$

876 where an element  $\Sigma_{i,j}^{-1}$  is the expected time that an individual who presently has state  $j$  will  
 877 spend in state  $i$  during its entire epidemiological *life*. The next generation matrix (NGM) is  
 878 then calculated as,

$$\text{NGM} = -T\Sigma^{-1} . \quad (31)$$

879 The basic reproduction number  $R_0$  is defined as the spectral radius<sup>3</sup>  $\rho$  of this matrix [27],

$$R_0 = \rho(-T\Sigma^{-1}) , \quad (32)$$

880 which becomes for our model,

$$R_{0,i} = (a_i d_a + \omega) \beta \sum_{j=1}^N N_{c,ij} . \quad (33)$$

881 A linear relationship between the reproduction number and the chance of infection upon  
 882 contact ( $\beta$ ), the number of contacts ( $N_c$ ) and the sum of the durations of infectiousness for  
 883 those compartments able to infect susceptibles makes sense.

## 884 A.5 Time-lagged cross correlation

885 We extracted the number of laboratory confirmed cases in youths  $[0, 20[$ , the working pop-  
 886 ulation  $[20, 60[$  and the senior population  $[60, \infty[$  from the *Belgian Scientific Institute of Public*  
 887 *Health* (<https://epistat.sciensano.be/Data>) from November 2nd, 2020 to February  
 888 1st 2020. We then normalized the timeseries with the number of cases on November 21st,  
 889 2020 and visualized the result in Figure 4. Using the Python module *pandas*, the dataseries  
 890 were shifted with  $k$  days and the cross correlation was computed. The procedure was per-  
 891 formed for  $k \in [-15, 5]$  days, the resulting *cross correlation function* is shown in Figure 8 and  
 892 the results of the analysis are summarized in Table 3. Next, we constructed a statistical test to  
 893 check if the covariance between two series  $x$  and  $y$ , shifted with the number of days resulting  
 894 in the maximum covariance,  $k_{max}$ , varied significantly from zero. Thus, the null hypothesis  
 895 is,

$$H_0 : \rho_{xy}(k_{max}) = 0.0 . \quad (34)$$

896 If the cross correlation of lag  $k_{max}$  is zero, then, for a fairly large timeseries consisting of  $n$   
 897 datapoints, the covariance  $\rho_{xy}(k_{max})$  will be approximately normally distributed, with mean  
 898 zero and standard deviation  $\sigma = \frac{1}{\sqrt{n-|k|}}$ . Since approximately 95% of a normal population  
 899 is within 2 standard deviations of the mean, a test will reject the hypothesis that the cross  
 900 correlation of lag  $k$  equals zero when,

$$|\rho(k)| \geq \frac{2}{\sqrt{n-|k|}} . \quad (35)$$

901 The null hypothesis was rejected for all timeseries.

902

---

<sup>3</sup>Largest absolute eigenvalue.



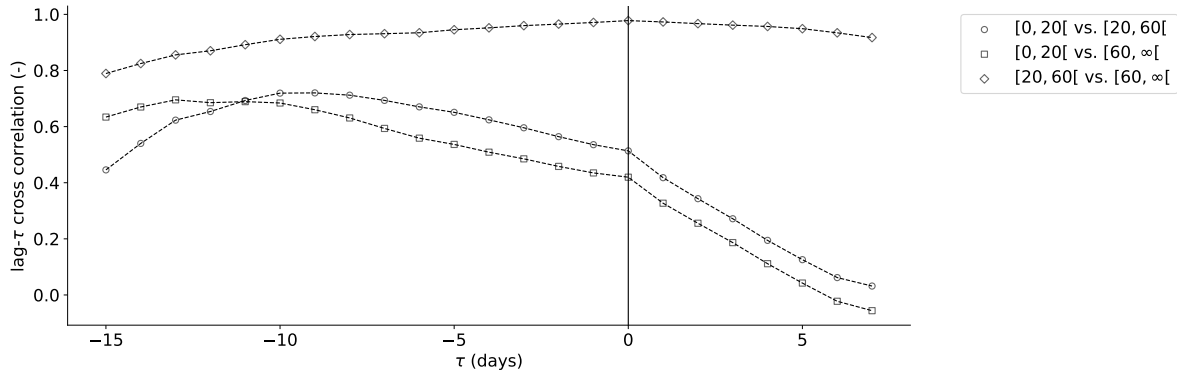

**Figure 8:** Cross correlation between the number of cases in Belgium in the age groups  $[0-20[$ ,  $[20-60[$  and  $[60-\infty[$ , from November 2nd, 2020 until February 1st 2020 in function of the number of days the timeseries are shifted relative to each other ( $\tau$ ). The maximum cross correlation is obtained when the series  $[0-20[$  and  $[20-60[$  are shifted -9 days, the maximum cross correlation is obtained when the series  $[0-20[$  and  $[60-\infty[$  are shifted -13 days, and the maximum cross correlation is obtained when the series  $[20-60[$  and  $[60-\infty[$  are not shifted.

Table 3: Results of the time-lagged cross-correlation between the number of cases in the age groups  $[0-20[$ ,  $[20-60[$  and  $[60-\infty[$ . Data from November 2nd, 2020 until February 1st 2020 were used in the analysis, which is equal to the daterange range shown in Figure 4.

| Age group (years)           | Time-lag (days) | Covariance (-) |
|-----------------------------|-----------------|----------------|
| $[0-20[$ vs. $[20-60[$      | -9              | 0.72           |
| $[0-20[$ vs. $[60-\infty[$  | -13             | 0.70           |
| $[20-60[$ vs. $[60-\infty[$ | 0               | 0.98           |

903 **A.6 Supplementary data and figures**

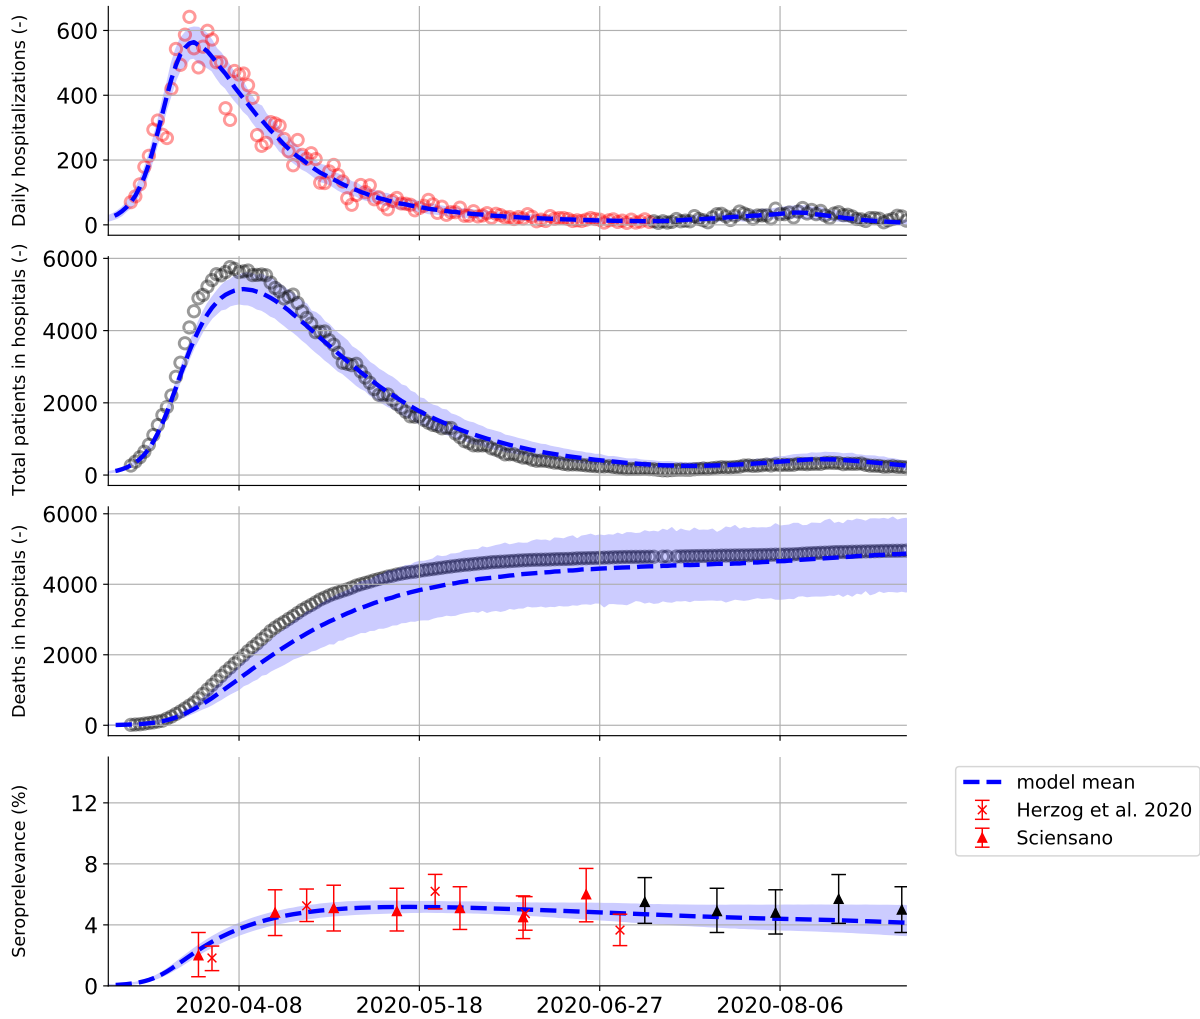

**Figure 9:** (top to bottom) Model predictions and data during the first COVID-19 wave in Belgium, from March 15th, 2020 until September 1st, 2020: 1) The daily Belgian hospitalizations, 2) the total number of patients in Belgium hospitals, 3) the total number of deceased patients in Belgian hospitals, 4) the seroprevalence in the Belgian population. Mean and 95 % confidence interval of 1000 model realisations. Red datapoints indicate the data was used in the model calibration, black datapoints indicate data was not used in the model calibration. The model is calibrated to the daily Belgian hospitalizations (top), the prediction for the total number of patients in Belgian hospitals and total number of deceased patients in Belgian hospitals are obtained by propagating the age-stratified mortalities ( $m_C$  and  $m_{ICU}$ ), age-stratified distributions between cohort and ICU ( $c$ ) and the residence time distributions derived from the hospital dataset in the model ( $d_{C,R}$ ,  $d_{C,ICU}$ ,  $d_{ICU,R}$ ,  $d_{ICU,D}$ ) (see Table 4 and 5).

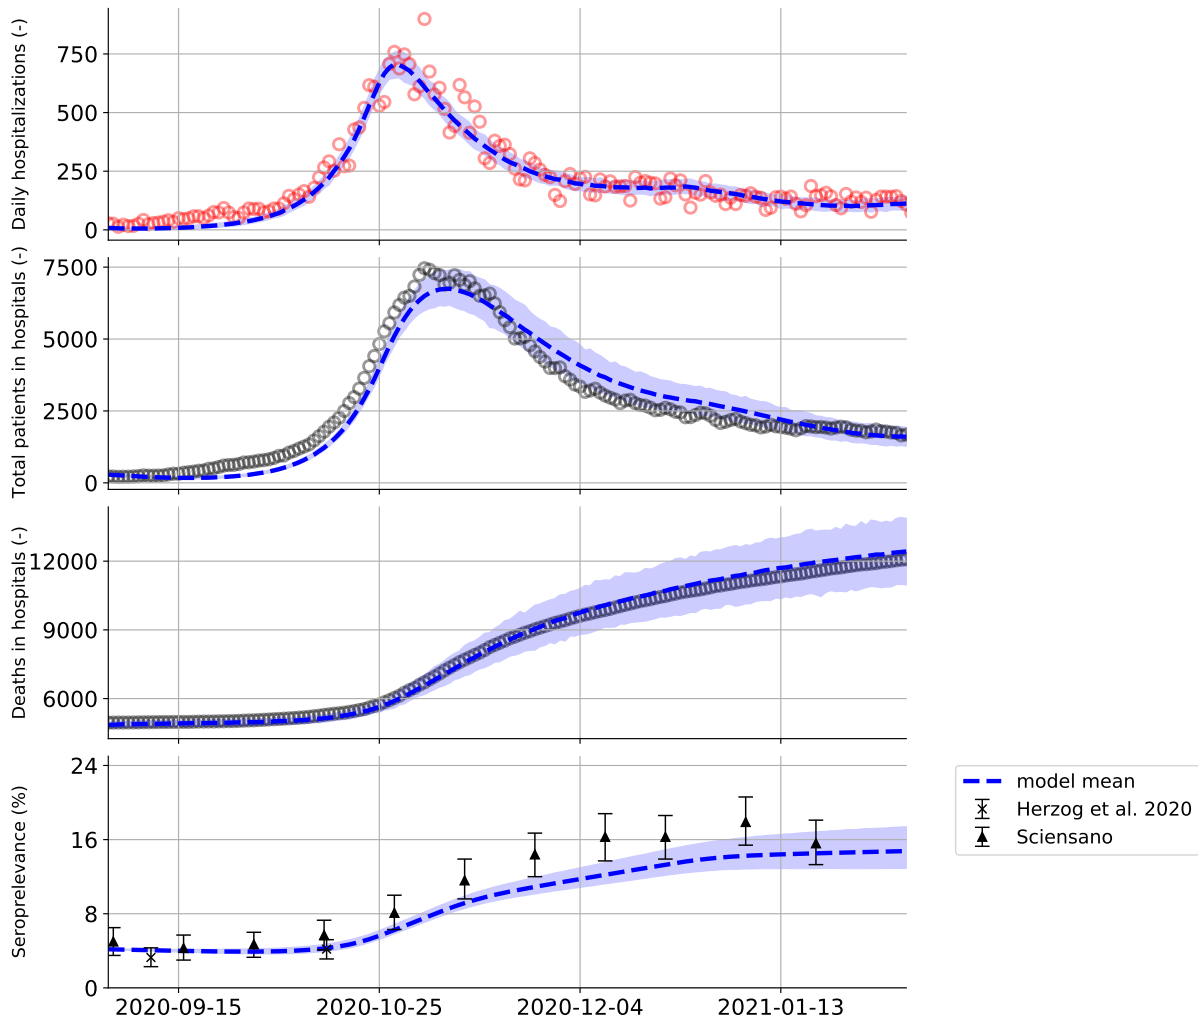

**Figure 10:** (top to bottom) Model predictions and data during the second COVID-19 wave in Belgium, from September 1st, 2020 until February 1st, 2021: 1) The daily Belgian hospitalizations, 2) the total number of patients in Belgium hospitals, 3) the total number of deceased patients in Belgian hospitals, 4) the seroprevalence in the Belgian population. Mean and 95 % confidence interval of 1000 model realisations. Red datapoints indicate the data was used in the model calibration, black datapoints indicate data was not used in the model calibration. The model is calibrated to the daily Belgian hospitalizations (top), the prediction for the total number of patients in Belgian hospitals and total number of deceased patients in Belgian hospitals are obtained by propagating the age-stratified mortalities ( $m_C$  and  $m_{ICU}$ ), age-stratified distributions between cohort and ICU ( $e$ ) and the residence time distributions derived from the hospital dataset in the model ( $d_{C,R}$ ,  $d_{C,ICU}$ ,  $d_{ICU,R}$ ,  $d_{ICU,D}$ ) (see Table 4 and 5).

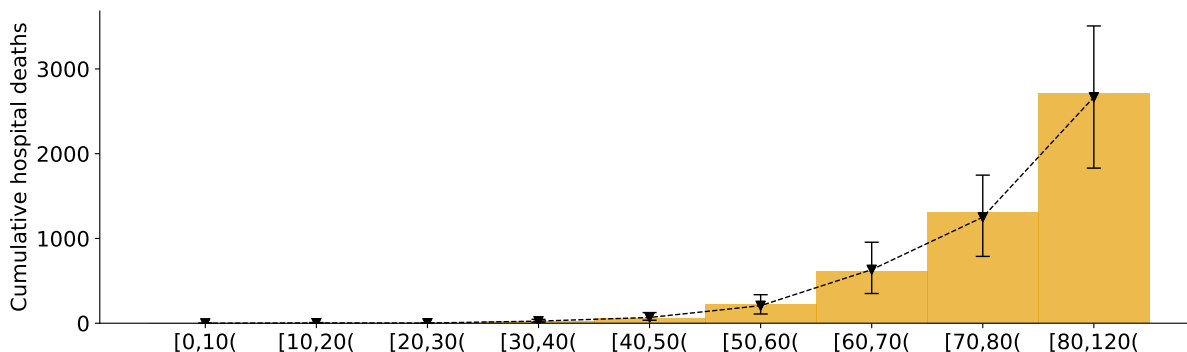

**Figure 11:** Cumulative deaths in Belgian hospitals per ten-year age strata. For the first Belgian 2020 COVID-19 wave, from March 1st, 2020 until September 1st, 2020. Yellow bars represent the data collected by Sciensano, inverted triangles represent the model prediction mean with 95 % confidence interval.

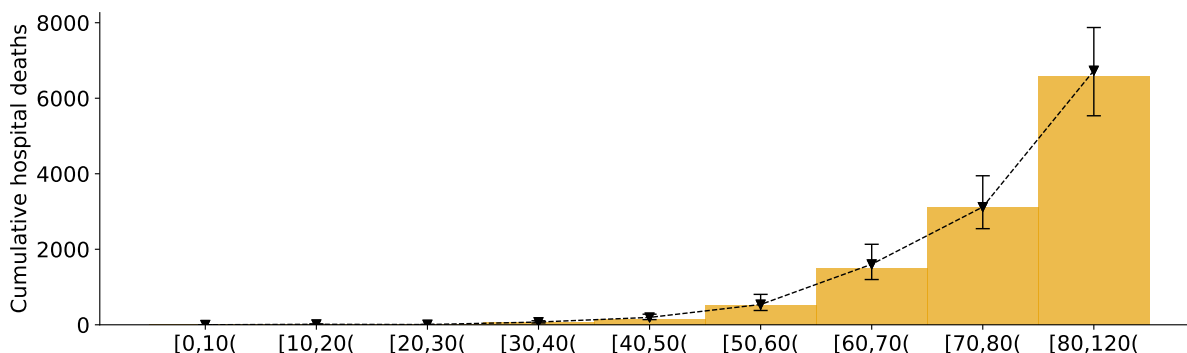

**Figure 12:** Cumulative deaths in Belgian hospitals per ten-year age strata. For the second Belgian 2020 COVID-19 wave, from September 1st, 2020 until February 1st, 2021. Yellow bars represent the data collected by Sciensano, inverted triangles represent the model prediction mean with 95 % confidence interval.

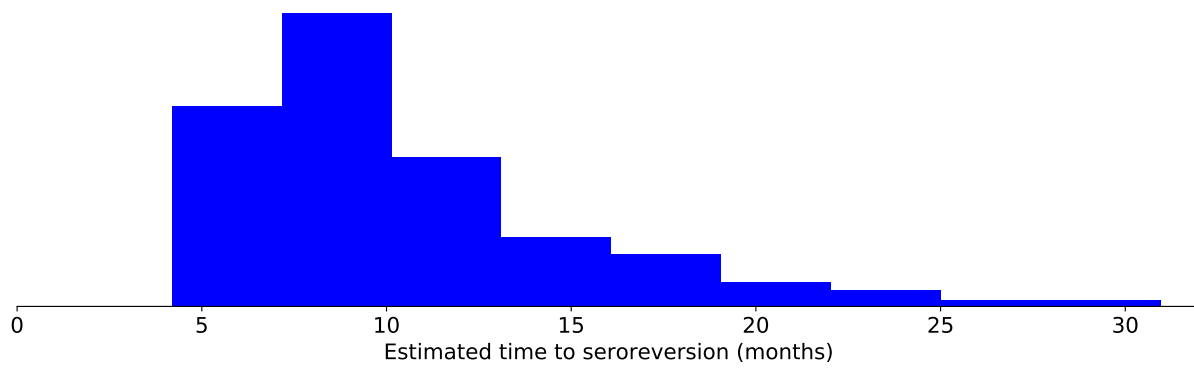

**Figure 13:** Estimated distribution of the time to seroreversion ( $1/\zeta$ ). The mean time to seroreversion is 9.2 months (IQR: 7.2 months - 12.1 months).

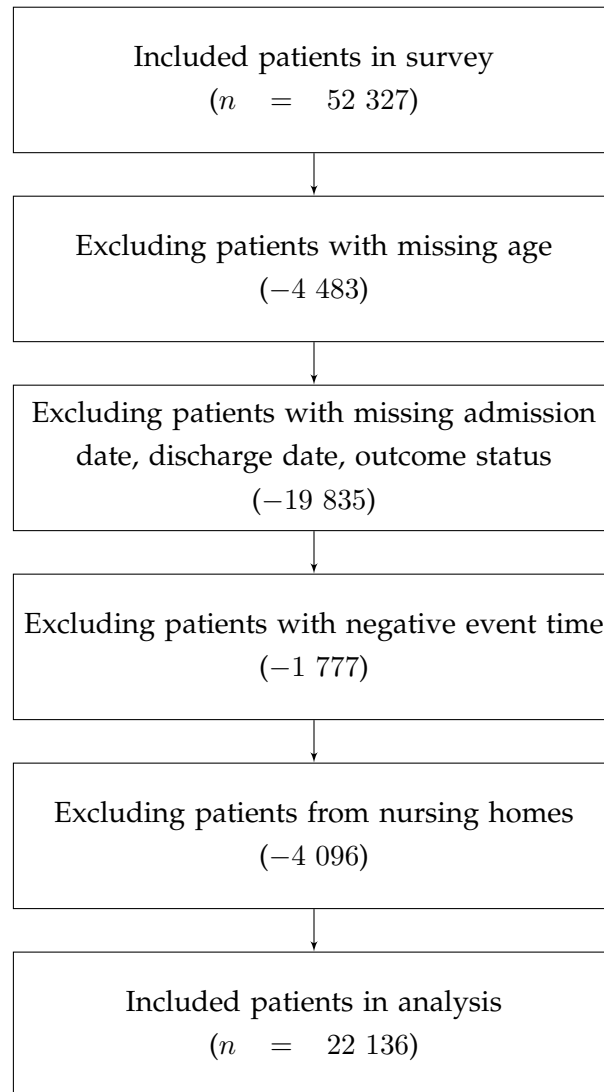

**Figure 14:** Flow diagram illustrating the number of patient data excluded from the survey and the reason thereof.

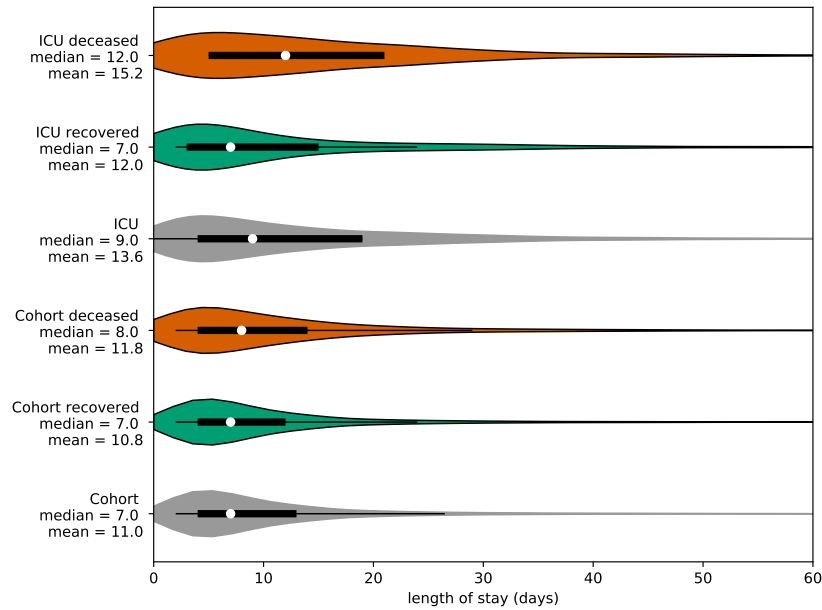

**Figure 15:** Observations of the length of a hospital stay for patients in cohort and ICU wards. Overall (gray), if recovered (green), if deceased (red). Residence times in cohort are shorter than residence times in ICU. In both wards, recovered patients have longer stays than deceased patients.

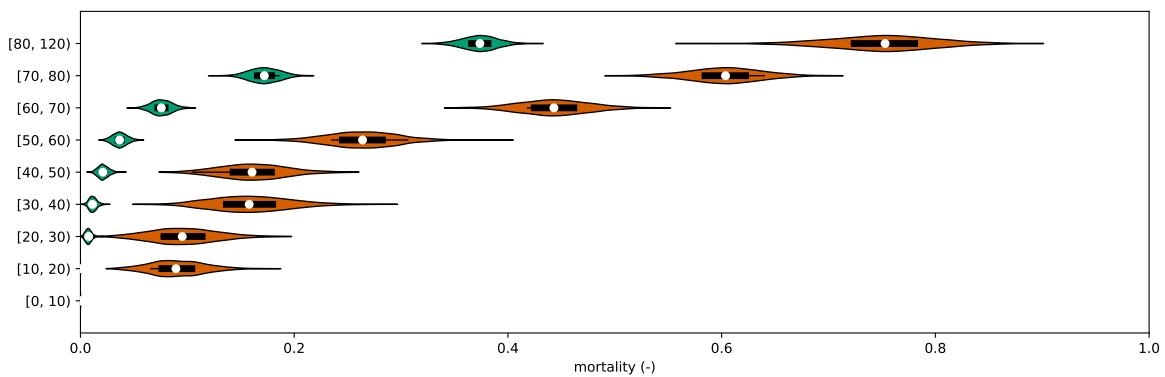

**Figure 16:** Mortality in cohort ( $m_C$ , green) and mortality in ICU ( $m_{ICU}$ , red) per ten-year age strata. Obtained by bootstrap resampling of the Belgian COVID-19 clinical surveillance on hospitalizations by Van Goethem et al. [40]. Mortality in both wards increases with patient age, mortality in ICU is higher than mortality in cohort.

Table 4: Computed fraction of hospitalized patients remaining in cohort and not transferring to ICU ( $c$ ), pooled mortality in cohort and ICU ( $m_{C,ICU}$ ), mortality in cohort ( $m_C$ ) and mortality in ICU ( $m_{ICU}$ ) per ten-year age strata. Estimates obtained by bootstrap resampling from the Belgian COVID-19 clinical surveillance on hospitalizations by Van Goethem et al. [40].

| Age group         | n (-)  | $c$ (%) |             | $m_{C,ICU}$ (%) |             | $m_C$ (%) |             | $m_{ICU}$ (%) |             |
|-------------------|--------|---------|-------------|-----------------|-------------|-----------|-------------|---------------|-------------|
|                   |        | mean    | 95% CI      | mean            | 95% CI      | mean      | 95% CI      | mean          | 95% CI      |
| [0, 10[           | 404    | 98.0    | 97.7 - 98.3 | 0.0             | NA          | 0.0       | NA          | 0.0           | NA          |
| [10, 20[          | 169    | 87.0    | 86.3 - 87.7 | 1.2             | 1.0 - 1.4   | 0.0       | NA          | 8.9           | 7.3 - 10.7  |
| [20, 30[          | 578    | 91.1    | 90.1 - 91.6 | 1.5             | 1.3 - 1.8   | 0.8       | 0.6 - 1.0   | 9.5           | 7.5 - 11.7  |
| [30, 40[          | 1042   | 89.8    | 89.1 - 90.4 | 2.7             | 2.4 - 3.0   | 1.1       | 0.9 - 1.4   | 15.8          | 13.3 - 18.3 |
| [40, 50[          | 1873   | 85.8    | 85.1 - 86.5 | 4.1             | 3.7 - 4.6   | 2.1       | 1.8 - 2.5   | 16.1          | 14.0 - 18.2 |
| [50, 60[          | 3267   | 80.9    | 80.1 - 81.7 | 8.0             | 7.4 - 8.6   | 3.7       | 3.2 - 4.1   | 26.4          | 24.2 - 28.6 |
| [60, 70[          | 3952   | 75.9    | 75.0 - 76.8 | 16.4            | 15.6 - 17.2 | 7.6       | 6.9 - 8.2   | 44.3          | 42.1 - 46.5 |
| [70, 80[          | 4844   | 78.3    | 77.4 - 79.2 | 26.6            | 25.7 - 27.6 | 17.2      | 16.3 - 18.2 | 60.3          | 58.1 - 62.6 |
| [80, $\infty$ [   | 6007   | 91.8    | 91.2 - 92.3 | 40.4            | 39.4 - 41.5 | 37.4      | 36.3 - 38.4 | 75.3          | 72.0 - 78.4 |
| <b>Population</b> | 22 136 | 83.8    | 83.0 - 84.6 | 21.4            | 20.6 - 22.3 | 16.6      | 15.7 - 17.5 | 46.3          | 43.8 - 49.0 |

46

904

905



Table 5: Hospital residence time in cohort, irregardless of COVID-19 outcome ( $d_C$ ), residence time in cohort, in case of recovery ( $d_{C,R}$ ), residence time in cohort, in case of death ( $d_{C,D}$ ). Hospital residence time in IC, irregardless of COVID-19 outcome ( $d_{ICU}$ ), residence time in IC, in case of recovery ( $d_{ICU,R}$ ), residence time in IC, in case of death ( $d_{ICU,D}$ ) per ten-year age strata. Scale and shape parameters of Weibull distribution fitted to the residence time data. Estimates obtained by analyzing a subset of data from the Belgian COVID-19 clincial surveillance on hospitalizations by Van Goethem et al. [40].

| Age group         | $d_C$ (days)     |            |       |       | $d_{C,R}$ (days)   |            |       |       | $d_{C,D}$ (days)   |            |       |       |
|-------------------|------------------|------------|-------|-------|--------------------|------------|-------|-------|--------------------|------------|-------|-------|
|                   | mean             | IQR        | scale | shape | mean               | IQR        | scale | shape | mean               | IQR        | scale | shape |
| [0, 10[           | 3.4              | 2.0 - 4.0  | 3.66  | 1.22  | 3.4                | 2.0 - 4.0  | 3.66  | 1.22  | NA                 | NA         | NA    | NA    |
| [10, 20[          | 6.3              | 2.0 - 7.0  | 5.64  | 0.85  | 6.3                | 2.0 - 7.0  | 5.64  | 0.85  | NA                 | NA         | NA    | NA    |
| [20, 30[          | 4.9              | 2.0 - 5.0  | 4.86  | 0.98  | 4.9                | 2.0 - 5.0  | 4.86  | 0.98  | 5.0                | 3.5 - 6.0  | 5.67  | 2.10  |
| [30, 40[          | 5.5              | 3.0 - 6.0  | 5.77  | 1.12  | 5.5                | 3.0 - 6.0  | 5.77  | 1.12  | 6.1                | 2.0 - 11.0 | 6.38  | 1.13  |
| [40, 50[          | 6.3              | 3.0 - 8.0  | 6.81  | 1.22  | 6.3                | 3.0 - 8.0  | 6.81  | 1.22  | 6.8                | 2.3 - 8.8  | 6.94  | 1.03  |
| [50, 60[          | 7.6              | 4.0 - 9.0  | 8.12  | 1.16  | 7.6                | 4.0 - 9.0  | 8.07  | 1.17  | 9.1                | 3.0 - 10.0 | 9.16  | 1.01  |
| [60, 70[          | 10.0             | 4.0 - 11.0 | 10.32 | 1.08  | 9.9                | 4.0 - 11.0 | 10.31 | 1.10  | 11.2               | 3.0 - 14.0 | 10.32 | 0.86  |
| [70, 80[          | 12.6             | 5.0 - 14.0 | 13.11 | 1.10  | 12.6               | 5.0 - 14.0 | 13.24 | 1.13  | 12.6               | 4.0 - 13.0 | 12.42 | 0.97  |
| [80, $\infty$ [   | 15.6             | 6.0 - 19.0 | 16.37 | 1.13  | 17.8               | 8.0 - 22.0 | 19.1  | 1.21  | 11.9               | 4.0 - 15.0 | 12.21 | 1.06  |
| <b>Population</b> | 11.0             | 4.0 - 13.0 | 9.09  | 1.21  | 10.8               | 4.0 - 12.0 | 8.72  | 1.24  | 11.8               | 4.0 - 14.0 | 10.97 | 1.08  |
| Age group         | $d_{ICU}$ (days) |            |       |       | $d_{ICU,R}$ (days) |            |       |       | $d_{ICU,D}$ (days) |            |       |       |
|                   | mean             | IQR        | scale | shape | mean               | IQR        | scale | shape | mean               | IQR        | scale | shape |
| [0, 10[           | 6.0              | 2.0 - 8.3  | 6.40  | 1.19  | 6.7                | 2.0 - 8.5  | 7.37  | 1.37  | NA                 | NA         | NA    | NA    |
| [10, 20[          | 4.9              | 2.0 - 5.0  | 5.26  | 1.25  | 4.0                | 2.0 - 5.0  | 4.44  | 1.43  | 16.0               | NA         | NA    | NA    |
| [20, 30[          | 9.6              | 2.0 - 10.0 | 8.86  | 0.87  | 8.9                | 2.0 - 10.0 | 8.34  | 0.89  | 18.0               | 4.5 - 25.5 | 16.97 | 0.89  |
| [30, 40[          | 10.1             | 2.0 - 13.3 | 11.08 | 1.00  | 9.4                | 2.0 - 11.0 | 8.72  | 0.87  | 14.0               | 5.0 - 20.0 | 14.86 | 1.20  |
| [40, 50[          | 11.3             | 3.0 - 14.0 | 12.75 | 1.00  | 10.6               | 3.0 - 12.0 | 10.34 | 0.95  | 15.1               | 4.5 - 21.0 | 16.38 | 1.30  |
| [50, 60[          | 14.1             | 5.0 - 19.0 | 1.05  | 1.00  | 11.7               | 4.0 - 15.8 | 12.02 | 1.08  | 19.7               | 8.5 - 27.0 | 20.60 | 1.16  |
| [60, 70[          | 14.7             | 5.0 - 21.0 | 1.05  | 1.00  | 13.2               | 4.0 - 17.0 | 13.00 | 0.97  | 16.5               | 6.0 - 23.0 | 17.52 | 1.21  |
| [70, 80[          | 15.0             | 5.0 - 21.0 | 1.05  | 1.00  | 14.6               | 4.0 - 21.0 | 14.47 | 0.98  | 15.2               | 6.0 - 21.0 | 15.83 | 1.12  |
| [80, $\infty$ [   | 10.8             | 3.0 - 14.0 | 12.58 | 1.00  | 7.9                | 2.0 - 9.0  | 7.54  | 0.92  | 11.7               | 3.0 - 15.0 | 11.25 | 0.92  |
| <b>Population</b> | 13.6             | 4.0 - 19.0 | 11.41 | 1.21  | 12.0               | 3.0 - 15.0 | 12.32 | 0.98  | 15.2               | 5.0 - 21.0 | 13.77 | 1.10  |

Table 6: Hospital residence time for a recovery stay in cohort, after a stay in ICU ( $d_{\text{ICU,rec}}$ ), time from symptom onset to hospitalization ( $d_{\text{hospital}}$ ) per ten-year age strata. Scale and shape parameters of Weibull distribution fitted to the residence time data. Estimates obtained by analyzing a subset of data from the Belgian COVID-19 clinical surveillance on hospitalizations by Van Goethem et al. [40].

| Age group         | $d_{\text{ICU,rec}}$ (days) |            |       |       | $d_{\text{hosp}}$ (days) |            |       |       |
|-------------------|-----------------------------|------------|-------|-------|--------------------------|------------|-------|-------|
|                   | mean                        | IQR        | scale | shape | mean                     | IQR        | scale | shape |
| [0, 10[           | 9.9                         | 0.5 - 3.0  | 3.18  | 0.40  | 2.2                      | 0.0 - 2.0  | 0.86  | 0.43  |
| [10, 20[          | 3.4                         | 3.0 - 4.0  | 2.99  | 0.70  | 5.6                      | 2.0 - 6.0  | 4.69  | 0.73  |
| [20, 30[          | 8.4                         | 3.0 - 10.8 | 8.18  | 0.94  | 6.0                      | 2.0 - 7.0  | 5.33  | 0.75  |
| [30, 40[          | 6.6                         | 2.0 - 7.0  | 5.88  | 0.80  | 6.7                      | 3.0 - 9.0  | 6.78  | 1.02  |
| [40, 50[          | 8.2                         | 3.0 - 8.0  | 7.97  | 0.94  | 7.4                      | 4.0 - 9.0  | 7.69  | 1.14  |
| [50, 60[          | 10.1                        | 4.0 - 11.0 | 10.02 | 0.99  | 7.5                      | 4.0 - 10.0 | 7.73  | 1.08  |
| [60, 70[          | 11.5                        | 4.0 - 14.0 | 11.58 | 1.01  | 6.9                      | 3.0 - 9.0  | 6.87  | 0.97  |
| [70, 80[          | 15.2                        | 6.0 - 20.0 | 15.29 | 1.02  | 6.6                      | 2.0 - 8.0  | 5.72  | 0.75  |
| [80, $\infty$ [   | 13.3                        | 6.0 - 16.0 | 14.11 | 1.23  | 5.0                      | 1.0 - 7.0  | 3.62  | 0.59  |
| <b>Population</b> | 11.2                        | 4.0 - 13.0 | 8.39  | 1.40  | 6.4                      | 2.0 - 8.0  | 10.11 | 0.63  |

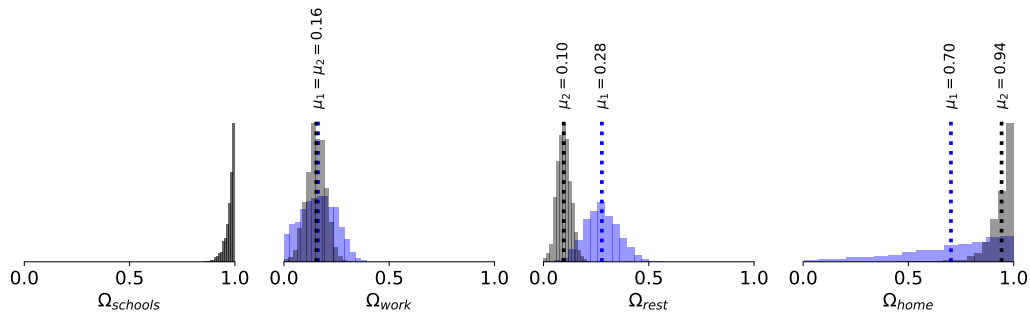

**Figure 17:** Inferred effectivity parameters at home ( $\Omega_{home}$ ), in the workplace ( $\Omega_{work}$ ), in schools ( $\Omega_{schools}$ ) and for the sum of leisure activities, other activities and public transport ( $\Omega_{rest}$ ), for the first COVID-19 wave (blue) and for the second COVID-19 wave (black). The effectivity of contacts in schools could not be deduced during the first COVID-19 wave because schools remained practically closed until July 1st, 2020. However, a high effectivity of contacts in schools could be deduced during the second COVID-19 wave. The effectivity of work contacts was roughly the same during both 2020 COVID-19 waves. The effectivity of leisure contacts was estimated to be lower during the second COVID-19 wave, however, leisure policies were not varied (yet) during the second COVID-19 wave, so the estimate must be taken with a grain of salt. Home contacts were deemed more effective by the model during the second COVID-19 wave.

907 **References**

- 908 [1] Qun Li, Xuhua Guan, Peng Wu, Xiaoye Wang, Lei Zhou, Yeqing Tong, Ruiqi Ren,  
909 Kathy S.M. Leung, Eric H.Y. Lau, Jessica Y. Wong, Xuesen Xing, Nijuan Xiang, Yang  
910 Wu, Chao Li, Qi Chen, Dan Li, Tian Liu, Jing Zhao, Man Liu, Wenxiao Tu, Chuding  
911 Chen, Lianmei Jin, Rui Yang, Qi Wang, Suhua Zhou, Rui Wang, Hui Liu, Yinbo Luo,  
912 Yuan Liu, Ge Shao, Huan Li, Zhongfa Tao, Yang Yang, Zhiqiang Deng, Boxi Liu, Zhi-  
913 tao Ma, Yanping Zhang, Guoqing Shi, Tommy T.Y. Lam, Joseph T. Wu, George F. Gao,  
914 Benjamin J. Cowling, Bo Yang, Gabriel M. Leung, and Zijian Feng. Early transmis-  
915 sion dynamics in wuhan, china, of novel coronavirus–infected pneumonia. *New Eng-  
916 land Journal of Medicine*, 0(0):null, 2020. doi: 10.1056/NEJMoa2001316. URL <https://doi.org/10.1056/NEJMoa2001316>.  
917 [//doi.org/10.1056/NEJMoa2001316](https://doi.org/10.1056/NEJMoa2001316).
- 918 [2] Julien Riou and Christian L. Althaus. Pattern of early human-to-human transmission  
919 of wuhan 2019 novel coronavirus (2019-ncov), december 2019 to january 2020. *Euro-  
920 surveillance*, 25(4):2000058, 2020. doi: [https://doi.org/10.2807/1560-7917.ES.2020.](https://doi.org/10.2807/1560-7917.ES.2020.25.4.2000058)  
921 [25.4.2000058](https://doi.org/10.2807/1560-7917.ES.2020.25.4.2000058). URL [https://www.eurosurveillance.org/content/10.2807/  
922 1560-7917.ES.2020.25.4.2000058](https://www.eurosurveillance.org/content/10.2807/1560-7917.ES.2020.25.4.2000058).
- 923 [3] Nicholas G Davies, Petra Klepac, Yang Liu, Kiesha Prem, Mark Jit, Carl A B Pear-  
924 son, Billy J Quilty, Adam J Kucharski, Hamish Gibbs, Samuel Clifford, Amy Gimma,  
925 Kevin van Zandvoort, James D Munday, Charlie Diamond, W John Edmunds, Rein M  
926 G J Houben, Joel Hellewell, Timothy W Russell, Sam Abbott, Sebastian Funk, Nikos I  
927 Bosse, Yueqian Fiona Sun, Stefan Flasche, Alicia Rosello, Christopher I Jarvis, Ros-  
928 alind M Eggo, and CMMID COVID-19 working Group. Age-dependent effects in  
929 the transmission and control of COVID-19 epidemics. *Nature Medicine*, 2020. ISSN  
930 1546-170X. doi: 10.1038/s41591-020-0962-9. URL [https://doi.org/10.1038/  
931 s41591-020-0962-9](https://doi.org/10.1038/s41591-020-0962-9).
- 932 [4] Robert Verity, Lucy C Okell, Ilaria Dorigatti, Peter Winskill, Charles Whittaker, Nat-  
933 suko Imai, Gina Cuomo-Dannenburg, Hayley Thompson, Patrick G T Walker, Han Fu,  
934 Amy Dighe, Jamie T Griffin, Marc Baguelin, Sangeeta Bhatia, Adhiratha Boonyasiri,  
935 Anne Cori, Zulma Cucunubá, Rich FitzJohn, Katy Gaythorpe, Will Green, Arran Ham-  
936 let, Wes Hinsley, Daniel Laydon, Gemma Nedjati-Gilani, Steven Riley, Sabine van El-  
937 sland, Erik Volz, Haowei Wang, Yuanrong Wang, Xiaoyue Xi, Christl A Donnelly,  
938 Azra C Ghani, and Neil M Ferguson. Estimates of the severity of coronavirus dis-  
939 ease 2019: a model-based analysis. *The Lancet Infectious Diseases*, may 2020. ISSN  
940 1473-3099. doi: 10.1016/S1473-3099(20)30243-7. URL [https://doi.org/10.1016/  
941 S1473-3099\(20\)30243-7](https://doi.org/10.1016/S1473-3099(20)30243-7).
- 942 [5] Geert Molenberghs, Christel Faes, Jan Aerts, Heidi Theeten, Brecht Devleesschauwer,

- 943 Natalia Bustos Sierra, Toon Braeye, Françoise Renard, Sereina Herzog, Patrick Lusyne,  
944 Johan Van der Heyden, Herman Van Oyen, Pierre Van Damme, and Niel Hens. Bel-  
945 gian covid-19 mortality, excess deaths, number of deaths per million, and infection fa-  
946 tality rates (8 march - 9 may 2020). *medRxiv*, 2020. doi: 10.1101/2020.06.20.20136234.  
947 URL [https://www.medrxiv.org/content/early/2020/06/20/2020.06.20.](https://www.medrxiv.org/content/early/2020/06/20/2020.06.20.20136234)  
948 [20136234](https://www.medrxiv.org/content/early/2020/06/20/2020.06.20.20136234).
- 949 [6] Y Liu, null null, S Funk, and S Flasche. The contribution of pre-symptomatic infection to  
950 the transmission dynamics of covid-2019 [version 1; peer review: 1 approved]. *Wellcome*  
951 *Open Research*, 5(58), 2020. doi: 10.12688/wellcomeopenres.15788.1.
- 952 [7] Wycliffe E. Wei, Zongbin Li, Calvin J. Chiew, Sarah E. Yong, Matthias P. Toh, and  
953 Vernon J. Lee. Presymptomatic Transmission of SARS-CoV-2 — Singapore, January  
954 23–March 16, 2020. *Morbidity and Mortality Weekly Report*, 69:411–415, 2020. doi:  
955 <http://dx.doi.org/10.15585/mmwr.mm6914e1>.
- 956 [8] Jeffrey Shaman and Marta Galanti. Will sars-cov-2 become endemic? *Science*, 370  
957 (6516):527–529, 2020. ISSN 0036-8075. doi: 10.1126/science.abe5960. URL [https://](https://science.sciencemag.org/content/370/6516/527)  
958 [science.sciencemag.org/content/370/6516/527](https://science.sciencemag.org/content/370/6516/527).
- 959 [9] Lander Willem, Steven Abrams, Oana Petrof, Pietro Coletti, Elise Kuylen, Pieter Li-  
960 bin, Signe Mogelmoose, James Wambua, Sereina A. Herzog, Christel Faes, Philippe  
961 Beutels, and Niel Hens. The impact of contact tracing and household bubbles on de-  
962 confinement strategies for covid-19: an individual-based modelling study. *medRxiv*,  
963 July 2020. URL [https://www.medrxiv.org/content/10.1101/2020.07.01.](https://www.medrxiv.org/content/10.1101/2020.07.01.20144444v3.full.pdf)  
964 [20144444v3.full.pdf](https://www.medrxiv.org/content/10.1101/2020.07.01.20144444v3.full.pdf).
- 965 [10] Kurt Barbe, Susanne Blotwijk, and Wilfried Cools. Data-driven epidemiological model  
966 to monitor the sustainability of hospital care. Technical Report ICDS300420, Vrije Uni-  
967 versiteit Brussel, 2020.
- 968 [11] Steven Abrams, James Wambua, Eva Santermans, Lander Willem, Elise Kuylen, Pietro  
969 Coletti, Pieter Libin, Christel Faes, Oana Petrof, Sereina A. Herzog, Philippe Beu-  
970 tels, and Niel Hens. Modelling the early phase of the belgian covid-19 epidemic us-  
971 ing a stochastic compartmental model and studying its implied future trajectories.  
972 *Epidemics*, 35:100449, 2021. ISSN 1755-4365. doi: [https://doi.org/10.1016/j.epidem.](https://doi.org/10.1016/j.epidem.2021.100449)  
973 [2021.100449](https://doi.org/10.1016/j.epidem.2021.100449). URL [https://www.sciencedirect.com/science/article/pii/](https://www.sciencedirect.com/science/article/pii/S1755436521000116)  
974 [S1755436521000116](https://www.sciencedirect.com/science/article/pii/S1755436521000116).
- 975 [12] Nicolas Franco. Covid-19 belgium: Extended seir-qd model with nursing homes and  
976 long-term scenarios-based forecasts. *medRxiv*, 2020. doi: 10.1101/2020.09.07.20190108.



- 1011 [21] Belen Prado-Vivar, Monica Becerra-Wong, Juan Jose Guadalupe, Sully Marquez,  
1012 Bernardo Gutierrez, Patricio Rojas-Silva, Michelle Grunauer, Gabriel Trueba, Veronica  
1013 Barragan, and Paul Cardenas. COVID-19 Re-Infection by a Phylogenetically Distinct  
1014 SARS-CoV-2 Variant, First Confirmed Event in South America. *SSRN Electronic Journal*,  
1015 2020. ISSN 1556-5068. doi: 10.2139/ssrn.3686174. URL [https://www.ssrn.com/  
1016 abstract=3686174](https://www.ssrn.com/abstract=3686174).
- 1017 [22] Jan Van Elslande, Pieter Vermeersch, Kris Vandervoort, Tony Wawina-Bokalanga, Bert  
1018 Vanmechelen, Elke Wollants, Lies Laenen, Emmanuel André, Marc Van Ranst, Katrien  
1019 Lagrou, and Piet Maes. Symptomatic Severe Acute Respiratory Syndrome Coronavirus  
1020 2 (SARS-CoV-2) Reinfection by a Phylogenetically Distinct Strain. *Clinical Infectious Dis-  
1021 eases*, 09 2020. doi: 10.1093/cid/ciaa1330.
- 1022 [23] Vivek Gupta, Rahul C Bhojar, Abhinav Jain, Saurabh Srivastava, Rashmi Upadhayay,  
1023 Mohamed Imran, Bani Jolly, Mohit Kumar Divakar, Disha Sharma, Paras Sehgal, Gyan  
1024 Ranjan, Rakesh Gupta, Vinod Scaria, and Sridhar Sivasubbu. Asymptomatic Reinfec-  
1025 tion in 2 Healthcare Workers From India With Genetically Distinct Severe Acute Respi-  
1026 ratory Syndrome Coronavirus 2. *Clinical Infectious Diseases*, 09 2020. ISSN 1058-4838.  
1027 doi: 10.1093/cid/ciaa1451. URL <https://doi.org/10.1093/cid/ciaa1451>.  
1028 ciaa1451.
- 1029 [24] Jason Rosado, Stéphane Pelleau, Charlotte Cockram, Sarah H el ene Merkle, Nari-  
1030 mane Nekkab, Caroline Demeret, Annalisa Meola, Solen Kerneis, Benjamin Terrier,  
1031 Samira Fafi-Kremer, Jerome de Seze, Timoth ee Bruel, Fran ois Dejardin, St ephane Pe-  
1032 tres, Rhea Longley, Arnaud Fontanet, Marija Backovic, Ivo Mueller, and Michael T  
1033 White. Multiplex assays for the identification of serological signatures of SARS-  
1034 CoV-2 infection: an antibody-based diagnostic and machine learning study. *The  
1035 Lancet. Microbe*, 2(2):e60–e69, feb 2021. ISSN 2666-5247. doi: 10.1016/S2666-5247(20)  
1036 30197-X. URL <http://www.ncbi.nlm.nih.gov/pubmed/33521709>[http://  
1037 www.pubmedcentral.nih.gov/articlerender.fcgi?artid=PMC7837364](http://www.pubmedcentral.nih.gov/articlerender.fcgi?artid=PMC7837364).
- 1038 [25] Adam K Wheatley, Jennifer A Juno, Jing J Wang, Kevin J Selva, Arnold Reynaldi, Hyon-  
1039 Xhi Tan, Wen Shi Lee, Kathleen M Wragg, Hannah G Kelly, Robyn Esterbauer, Saman-  
1040 tha K Davis, Helen E Kent, Francesca L Mordant, Timothy E Schlub, David L Gordon,  
1041 David S Khoury, Kanta Subbarao, Deborah Cromer, Tom P Gordon, Amy W Chung,  
1042 Miles P Davenport, and Stephen J Kent. Evolution of immune responses to SARS-  
1043 CoV-2 in mild-moderate COVID-19. *Nature Communications*, 12(1):1162, 2021. ISSN  
1044 2041-1723. doi: 10.1038/s41467-021-21444-5. URL [https://doi.org/10.1038/  
1045 s41467-021-21444-5](https://doi.org/10.1038/s41467-021-21444-5).
- 1046 [26] Russell M. Viner, Oliver T. Mytton, Chris Bonell, G. J. Melendez-Torres, Joseph Ward,  
1047 Lee Hudson, Claire Waddington, James Thomas, Simon Russell, Fiona van der Klis,

- 1048 Archana Koirala, Shamez Ladhani, Jasmina Panovska-Griffiths, Nicholas G. Davies,  
1049 Robert Booy, and Rosalind M. Eggo. Susceptibility to SARS-CoV-2 Infection Among  
1050 Children and Adolescents Compared With Adults: A Systematic Review and Meta-  
1051 analysis. *JAMA Pediatrics*, 175(2):143–156, 02 2021. ISSN 2168-6203. doi: 10.1001/  
1052 jamapediatrics.2020.4573. URL [https://doi.org/10.1001/jamapediatrics.](https://doi.org/10.1001/jamapediatrics.2020.4573)  
1053 2020.4573.
- 1054 [27] O Diekmann, J.A.P. Heesterbeek, and Metz J.A.J. On the definition and the computation  
1055 of the basic reproduction ratio  $R_0$  in models for infectious diseases in heterogeneous  
1056 populations. *Journal of mathematical biology*, 28(4):365–382, 1990. ISSN 0303-6812 (Print).  
1057 doi: 10.1007/BF00178324.
- 1058 [28] O Diekmann, J.A.P. Heesterbeek, and Roberts M.G. The construction of next-  
1059 generation matrices for compartmental epidemic models. *Journal of the Royal*  
1060 *Society, Interface*, 7(47):873–885, jun 2010. ISSN 1742-5662. doi: 10.1098/rsif.  
1061 2009.0386. URL <https://pubmed.ncbi.nlm.nih.gov/19892718>[https://www.](https://www.ncbi.nlm.nih.gov/pmc/articles/PMC2871801/)  
1062 [ncbi.nlm.nih.gov/pmc/articles/PMC2871801/](https://www.ncbi.nlm.nih.gov/pmc/articles/PMC2871801/).
- 1063 [29] Xi He, Eric H Y Lau, Peng Wu, Xilong Deng, Jian Wang, Xinxin Hao, Yiu Chung Lau,  
1064 Jessica Y Wong, Yujuan Guan, Xinghua Tan, Xiaoneng Mo, Yanqing Chen, Baolin Liao,  
1065 Weilie Chen, Fengyu Hu, Qing Zhang, Mingqiu Zhong, Yanrong Wu, Lingzhai Zhao,  
1066 Fuchun Zhang, Benjamin J Cowling, Fang Li, and Gabriel M Leung. Temporal dy-  
1067 namics in viral shedding and transmissibility of COVID-19. *Nature Medicine*, 26(5):  
1068 672–675, 2020. doi: 10.1038/s41591-020-0869-5. URL [https://doi.org/10.1038/](https://doi.org/10.1038/s41591-020-0869-5)  
1069 [s41591-020-0869-5](https://doi.org/10.1038/s41591-020-0869-5).
- 1070 [30] Yang Liu, Li-Meng Yan, Lagen Wan, Tian-Xin Xiang, Aiping Le, Jia-Ming Liu, Malik  
1071 Peiris, Leo L M Poon, and Wei Zhang. Viral dynamics in mild and severe cases of  
1072 COVID-19. *The Lancet Infectious Diseases*, 0(0), 2020. ISSN 1473-3099. doi: 10.1016/  
1073 S1473-3099(20)30232-2.
- 1074 [31] Francois-Xavier Lescure, Lila Bouadma, Duc Nguyen, Marion Parisey, Paul-Henri  
1075 Wicky, Sylvie Behillil, Alexandre Gaymard, Maude Bouscambert-Duchamp, Flora Do-  
1076 nati, Quentin Le Hingrat, Vincent Enouf, Nadhira Houhou-Fidouh, Martine Valette,  
1077 Alexandra Mailles, Jean-Christophe Lucet, France Mentre, Xavier Duval, Diane  
1078 Descamps, Denis Malvy, Jean-François Timsit, Bruno Lina, Sylvie Van-der Werf, and  
1079 Yazdan Yazdanpanah. Clinical and virological data of the first cases of COVID-19 in  
1080 Europe: a case series. *The Lancet Infectious Diseases*, 0(0), 2020. ISSN 1473-3099. doi:  
1081 10.1016/S1473-3099(20)30200-0.
- 1082 [32] Kelvin Kai-Wang To, Owen Tak-Yin Tsang, Wai-Shing Leung, Anthony Ray-  
1083 mond Tam, Tak-Chiu Wu, David Christopher Lung, Cyril Chik-Yan Yip, Jian-



- 1084 Piao Cai, Jacky Man-Chun Chan, Thomas Shiu-Hong Chik, Daphne Pui-Ling  
1085 Lau, Chris Yau-Chung Choi, Lin-Lei Chen, Wan-Mui Chan, Kwok-Hung Chan,  
1086 Jonathan Daniel Ip, Anthony Chin-Ki Ng, Rosana Wing-Shan Poon, Cui-Ting Luo,  
1087 Vincent Chi-Chung Cheng, Jasper Fuk-Woo Chan, Ivan Fan-Ngai Hung, Zhiwei  
1088 Chen, Honglin Chen, and Kwok-Yung Yuen. Temporal profiles of viral load in  
1089 posterior oropharyngeal saliva samples and serum antibody responses during in-  
1090 fection by SARS-CoV-2: an observational cohort study. *The Lancet Infectious Dis-*  
1091 *eases*, 20(5):565–574, may 2020. ISSN 1473-3099. doi: 10.1016/S1473-3099(20)  
1092 30196-1. URL [https://www.thelancet.com/journals/laninf/article/](https://www.thelancet.com/journals/laninf/article/PIIS1473-3099(20)30196-1/fulltext#.XsE5ulFUln8.mendeley)  
1093 [PIIS1473-3099\(20\)30196-1/fulltext#.XsE5ulFUln8.mendeley](https://www.thelancet.com/journals/laninf/article/PIIS1473-3099(20)30196-1/fulltext#.XsE5ulFUln8.mendeley).
- 1094 [33] Lirong Zou, Feng Ruan, Mingxing Huang, Lijun Liang, Huitao Huang, Zhongsi Hong,  
1095 Jianxiang Yu, Min Kang, Yingchao Song, Jinyu Xia, Qianfang Guo, Tie Song, Jianfeng  
1096 He, Hui-Ling Yen, Malik Peiris, and Jie Wu. Sars-cov-2 viral load in upper respiratory  
1097 specimens of infected patients. *New England Journal of Medicine*, 382(12):1177–1179, 2020.  
1098 doi: 10.1056/NEJMc2001737. URL <https://doi.org/10.1056/NEJMc2001737>.  
1099 PMID: 32074444.
- 1100 [34] Ruiyun Li, Sen Pei, Bin Chen, Yimeng Song, Tao Zhang, Wan Yang, and Jeffrey  
1101 Shaman. Substantial undocumented infection facilitates the rapid dissemination of  
1102 novel coronavirus (sars-cov2). *Science*, 2020. ISSN 0036-8075. doi: 10.1126/science.  
1103 abb3221. URL [https://science.sciencemag.org/content/early/2020/03/](https://science.sciencemag.org/content/early/2020/03/13/science.abb3221)  
1104 [13/science.abb3221](https://science.sciencemag.org/content/early/2020/03/13/science.abb3221).
- 1105 [35] Daniel F. Gudbjartsson, Agnar Helgason, Hakon Jonsson, Olafur T. Magnusson, Pall  
1106 Melsted, Gudmundur L. Norddahl, Jona Saemundsdottir, Asgeir Sigurdsson, Patrick  
1107 Sulem, Arna B. Agustsdottir, Berglind Eiriksdottir, Run Fridriksdottir, Elisabet E. Gar-  
1108 darsdottir, Gudmundur Georgsson, Olafia S. Gretarsdottir, Kjartan R. Gudmunds-  
1109 son, Thora R. Gunnarsdottir, Arnaldur Gylfason, Hilma Holm, Brynjar O. Jens-  
1110 son, Aslaug Jonasdottir, Frosti Jonsson, Kamilla S. Josefsdottir, Thordur Kristjansson,  
1111 Droplaug N. Magnusdottir, Louise le Roux, Gudrun Sigmundsdottir, Gardar Svein-  
1112 bjornsson, Kristin E. Sveinsdottir, Maney Sveinsdottir, Emil A. Thorarensen, Bjarni  
1113 Thorbjornsson, Arthur Löve, Gisli Masson, Ingileif Jonsdottir, Alma D. Möller, Thorol-  
1114 fur Gudnason, Karl G. Kristinsson, Unnur Thorsteinsdottir, and Kari Stefansson.  
1115 Spread of sars-cov-2 in the icelandic population. *New England Journal of Medicine*, 0  
1116 (0):null, 2020. doi: 10.1056/NEJMoa2006100. URL [https://doi.org/10.1056/](https://doi.org/10.1056/NEJMoa2006100)  
1117 [NEJMoa2006100](https://doi.org/10.1056/NEJMoa2006100).
- 1118 [36] Diana Buitrago-Garcia, Dianne Egli-Gany, Michel J. Counotte, Stefanie Hossmann, Hira  
1119 Imeri, Aziz Mert Ipekci, Georgia Salanti, and Nicola Low. Occurrence and transmis-  
1120 sion potential of asymptomatic and presymptomatic SARS-CoV-2 infections: A living

- 1121 systematic review and meta-analysis. *PLOS Medicine*, 17(9):e1003346, sep 2020. ISSN  
1122 1549-1676. doi: 10.1371/journal.pmed.1003346. URL [https://dx.plos.org/10.  
1123 1371/journal.pmed.1003346](https://dx.plos.org/10.1371/journal.pmed.1003346).
- 1124 [37] Joseph T Wu, Kathy Leung, Mary Bushman, Nishant Kishore, Rene Niehus, Pablo M  
1125 de Salazar, Benjamin J Cowling, Marc Lipsitch, and Gabriel M Leung. Estimating clin-  
1126 ical severity of COVID-19 from the transmission dynamics in Wuhan, China. *Nature  
1127 Medicine*, 26(4):506–510, 2020. ISSN 1546-170X. doi: 10.1038/s41591-020-0822-7. URL  
1128 <https://doi.org/10.1038/s41591-020-0822-7>.
- 1129 [38] Natalie M Linton, Tetsuro Kobayashi, Yichi Yang, Katsuma Hayashi, Andrei R Akhmet-  
1130 zhanov, Sung-Mok Jung, Baoyin Yuan, Ryo Kinoshita, and Hiroshi Nishiura. Incubation  
1131 Period and Other Epidemiological Characteristics of 2019 Novel Coronavirus Infections  
1132 with Right Truncation: A Statistical Analysis of Publicly Available Case Data. *Journal of  
1133 clinical medicine*, 9(2), feb 2020. ISSN 2077-0383 (Print). doi: 10.3390/jcm9020538.
- 1134 [39] Sereina Herzog, Jessie De Bie, Steven Abrams, Ine Wouters, Esra Ekinci, Lisbeth Pat-  
1135 teet, Astrid Coppens, Sandy De Spiegeleer, Philippe Beutels, Pierre Van Damme, Niel  
1136 Hens, and Heidi Theeten. Seroprevalence of igg antibodies against sars coronavirus 2  
1137 in belgium – a serial prospective cross-sectional nationwide study of residual samples.  
1138 *medRxiv*, 2021. doi: 10.1101/2020.06.08.20125179. URL [https://www.medrxiv.org/  
1139 content/early/2021/04/07/2020.06.08.20125179](https://www.medrxiv.org/content/early/2021/04/07/2020.06.08.20125179).
- 1140 [40] Nina Van Goethem, Aline Vilain, Chloé Wyndham-Thomas, Jessika Deblonde, Nathalie  
1141 Bossuyt, Tinne Lernout, Javiera Rebolledo Gonzalez, Sophie Quoilin, Vincent Melis,  
1142 and Dominique Van Beckhoven. Rapid establishment of a national surveillance of  
1143 COVID-19 hospitalizations in Belgium. *Archives of Public Health*, 78(1):121, 2020. ISSN  
1144 2049-3258. doi: 10.1186/s13690-020-00505-z. URL [https://doi.org/10.1186/  
1145 s13690-020-00505-z](https://doi.org/10.1186/s13690-020-00505-z).
- 1146 [41] Christel Faes, Steven Abrams, Dominique Van Beckhoven, Geert Meyfroidt, Erika  
1147 Vlieghe, Niel Hens, and Belgian Collaborative Group on COVID-19 Hospital Surveil-  
1148 lance. Time between symptom onset, hospitalisation and recovery or death: Statis-  
1149 tical analysis of belgian covid-19 patients. *International Journal of Environmental Re-  
1150 search and Public Health*, 17(20), 2020. doi: 10.3390/ijerph17207560. URL [https:  
1151 //www.mdpi.com/1660-4601/17/20/7560](https://www.mdpi.com/1660-4601/17/20/7560).
- 1152 [42] Ahmet Aktay, Shailesh Bavadekar, Gwen Cossoul, John Davis, Damien Desfontaines,  
1153 Alex Fabrikant, Evgeniy Gabrilovich, Krishna Gadepalli, Bryant Gipson, Miguel Gue-  
1154 vara, Chaitanya Kamath, Mansi Kansal, Ali Lange, Chinmoy Mandayam, Andrew  
1155 Oplinger, Christopher Pluntke, Thomas Roessler, Arran Schlosberg, Tomer Shekel,  
1156 Swapnil Vispute, Mia Vu, Gregory Wellenius, Brian Williams, and Royce J. Wilson.

- 1157 Google COVID-19 community mobility reports: Anonymization process description  
1158 (version 1.0). *CoRR*, abs/2004.04145, 2020. URL [https://arxiv.org/abs/2004.](https://arxiv.org/abs/2004.04145)  
1159 04145.
- 1160 [43] M. Sulyok and M. Walker. Community movement and covid-19: a global study using  
1161 google’s community mobility reports. *Epidemiology and Infection*, 148, 2020. doi: 10.  
1162 1017/S0950268820002757.
- 1163 [44] Joël Mossong, Niel Hens, Mark Jit, Philippe Beutels, Kari Auranen, Rafael Mikola-  
1164 jczyk, Marco Massari, Stefania Salmaso, Gianpaolo Scalia Tomba, Jacco Wallinga, Jan-  
1165 neke Heijne, Malgorzata Sadkowska-Todys, Magdalena Rosinska, and W. John Ed-  
1166 munds. Social contacts and mixing patterns relevant to the spread of infectious dis-  
1167 eases. *PLOS Medicine*, 5(3):1–1, 03 2008. doi: 10.1371/journal.pmed.0050074. URL  
1168 <https://doi.org/10.1371/journal.pmed.0050074>.
- 1169 [45] J. Kennedy and R. Eberhart. Particle swarm optimization. In *Proceedings of ICNN’95 -*  
1170 *International Conference on Neural Networks*, volume 4, pages 1942–1948 vol.4, 1995.
- 1171 [46] Lorenzo Pellis, Francesca Scarabel, Helena B. Stage, Christopher E. Overton, Lauren  
1172 H. K. Chappell, Elizabeth Fearon, Emma Bennett, Katrina A. Lythgoe, Thomas A.  
1173 House, Ian Hall, and null null. Challenges in control of covid-19: short doubling time  
1174 and long delay to effect of interventions. *Philosophical Transactions of the Royal Society B:*  
1175 *Biological Sciences*, 376(1829):20200264, 2021. doi: 10.1098/rstb.2020.0264. URL <https://royalsocietypublishing.org/doi/abs/10.1098/rstb.2020.0264>.
- 1177 [47] Zunyou Wu and Jennifer M. McGoogan. Characteristics of and important lessons from  
1178 the coronavirus disease 2019 (covid-19) outbreak in china: Summary of a report of 72314  
1179 cases from the chinese center for disease control and prevention. *JAMA*, 02 2020. ISSN  
1180 0098-7484. doi: 10.1001/jama.2020.2648.
- 1181 [48] CDC COVID-19 Response Team. Severe Outcomes Among Patients with Coronavirus  
1182 Disease 2019 (COVID-19) - United States, February 12-March 16, 2020. *Morbidity and*  
1183 *Mortality Weekly Report*, 69:343–346, 2020. doi: [http://dx.doi.org/10.15585/mmwr.](http://dx.doi.org/10.15585/mmwr.mm6912e2)  
1184 mm6912e2.
- 1185 [49] Bindu Vekaria, Christopher Overton, Arkadiusz Wisniowski, Shazaad Ahmad, Andrea  
1186 Aparicio-Castro, Jacob Curran-Sebastian, Jane Eddleston, Neil Hanley, Thomas House,  
1187 Jihye Kim, Wendy Olsen, Maria Pampaka, Lorenzo Pellis, Diego Perez Ruiz, John  
1188 Schofield, Nick Shryane, and Mark Elliot. Hospital Length of Stay For COVID-19 Pa-  
1189 tients: Data-Driven Methods for Forward Planning. *BMC Infectious Diseases*, 2021. ISSN  
1190 2693-5015. doi: 10.21203/rs.3.rs-56855/v1. URL [https://doi.org/10.21203/rs.](https://doi.org/10.21203/rs.3.rs-56855/v1)  
1191 3.rs-56855/v1.

- 1192 [50] M Vandromme, R De Pauw, B Serrien, N Van Goethem, and K Blot. Covid-19 clinical  
1193 hospital surveillance report. , Belgian Federal Institute for Public Health, 2021.
- 1194 [51] Itai Dattner, Yair Goldberg, Guy Katriel, Rami Yaari, Nurit Gal, Yoav Miron, Arnona Ziv,  
1195 Rivka Sheffer, Yoram Hamo, and Amit Huppert. The role of children in the spread of  
1196 covid-19: Using household data from bnei brak, israel, to estimate the relative suscep-  
1197 tibility and infectivity of children. *PLOS Computational Biology*, 17(2):1–19, 02 2021. doi:  
1198 10.1371/journal.pcbi.1008559. URL [https://doi.org/10.1371/journal.pcbi.](https://doi.org/10.1371/journal.pcbi.1008559)  
1199 1008559.
- 1200 [52] Kim Van Kerckhove, Niel Hens, W John Edmunds, and Ken T D Eames. The impact  
1201 of illness on social networks: implications for transmission and control of influenza.  
1202 *American journal of epidemiology*, 178(11):1655–1662, dec 2013. ISSN 1476-6256. doi: 10.  
1203 1093/aje/kwt196. URL <https://pubmed.ncbi.nlm.nih.gov/24100954><https://www.ncbi.nlm.nih.gov/pmc/articles/PMC3842903/>.
- 1205 [53] Belgian Federal Gouvernement. De trends van de afgelopen dagen zetten  
1206 zich voort, 2020. URL [https://www.info-coronavirus.be/nl/news/](https://www.info-coronavirus.be/nl/news/trends-laatste-dagen-zetten-zich-door/)  
1207 [trends-laatste-dagen-zetten-zich-door/](https://www.info-coronavirus.be/nl/news/trends-laatste-dagen-zetten-zich-door/).
- 1208 [54] StatBEL. Structure of the Population, 2020. URL [https://statbel.fgov.be/en/](https://statbel.fgov.be/en/themes/population/structure-population{#}panel-11)  
1209 [themes/population/structure-population{#}panel-11](https://statbel.fgov.be/en/themes/population/structure-population{#}panel-11).
- 1210 [55] Sven Whatty. Tijdelijke werkloosheid bijna gehalveerd. *Het Laatste*  
1211 *Nieuws*, June 2020. URL [https://www.hln.be/de-krant/](https://www.hln.be/de-krant/tijdelijke-werkloosheid-bijna-gehalveerd~a092a080/?referer=https%3A%2F%2Fwww.google.be%2F)  
1212 [tijdelijke-werkloosheid-bijna-gehalveerd~a092a080/?referer=](https://www.hln.be/de-krant/tijdelijke-werkloosheid-bijna-gehalveerd~a092a080/?referer=https%3A%2F%2Fwww.google.be%2F)  
1213 [https%3A%2F%2Fwww.google.be%2F](https://www.hln.be/de-krant/tijdelijke-werkloosheid-bijna-gehalveerd~a092a080/?referer=https%3A%2F%2Fwww.google.be%2F).
- 1214 [56] Tommy Thijs. Alles op alles om italiaanse situatie te vermijden. *Het*  
1215 *Laatste Nieuws*, March 2020. URL [https://www.hln.be/binnenland/](https://www.hln.be/binnenland/alles-op-alles-om-italiaans-scenario-te-vermijden-deze-grafiek-toont-aan-waar)  
1216 [alles-op-alles-om-italiaans-scenario-te-vermijden-deze-grafiek-toont-aan-waar](https://www.hln.be/binnenland/alles-op-alles-om-italiaans-scenario-te-vermijden-deze-grafiek-toont-aan-waar)
- 1217 [57] Open VLD. Coronavirus : België heeft z'n exitstrate-  
1218 gie vastgelegd, 2020. URL [https://www2.openvld.be/](https://www2.openvld.be/coronavirus-belgie-heeft-zn-exitstrategie-vastgelegd/)  
1219 [coronavirus-belgie-heeft-zn-exitstrategie-vastgelegd/](https://www2.openvld.be/coronavirus-belgie-heeft-zn-exitstrategie-vastgelegd/).
- 1220 [58] Vlaamse regering. Heropstart van de lessen op school: wie, waarom  
1221 en hoe, 2020. URL [https://onderwijs.vlaanderen.be/nl/](https://onderwijs.vlaanderen.be/nl/heropstart-lessen-op-school-wie-waarom-hoe)  
1222 [heropstart-lessen-op-school-wie-waarom-hoe](https://onderwijs.vlaanderen.be/nl/heropstart-lessen-op-school-wie-waarom-hoe).
- 1223 [59] Stijn Cools. Antwerpen voert avondklok in. *De Standaard*, July 2020. URL [https://www.standaard.be/cnt/dmf20200727\\_97687460](https://www.standaard.be/cnt/dmf20200727_97687460).  
1224 [https://www.standaard.be/cnt/dmf20200727\\_97687460](https://www.standaard.be/cnt/dmf20200727_97687460).

- 1225 [60] Jan-Frederik Abbeloos. Alle munitie uit de kast om dijkbreuk te vermijden. *De*  
1226 *Standaard*, Oct 2020. URL [https://www.standaard.be/cnt/dmf20201016\\_](https://www.standaard.be/cnt/dmf20201016_97421280)  
1227 97421280.
- 1228 [61] Jan-Frederik Abbeloos. 'dit zijn de maatregelen van de laatste kans'. *De Standaard*, Oct  
1229 2020. URL [https://www.standaard.be/cnt/dmf20201030\\_97719827](https://www.standaard.be/cnt/dmf20201030_97719827).
- 1230 [62] Dries De Smet. De britse variant is niet meer te stuiten, de britse golf wel. *De Standaard*,  
1231 Jan 2021. URL [https://www.standaard.be/cnt/dmf20210128\\_94562948](https://www.standaard.be/cnt/dmf20210128_94562948).
- 1232 [63] Koen Snoekx. Vaccinaties in rusthuizen komen in stroomversnelling. *De Standaard*, Jan  
1233 2021. URL [https://www.standaard.be/cnt/dmf20210111\\_97978032](https://www.standaard.be/cnt/dmf20210111_97978032).
- 1234 [64] Philip Hartman. A lemma in the theory of structural stability of differential equations.  
1235 *Proceedings of the American Mathematical Society*, 11:610–620, 1960.
